# Supplementary material for: Quantum chemical calculation of the vapor pressure of volatile and semi volatile organic compounds
Source: Royal Society of Chemistry journal article supplement (doi:10.1039/d2em00271j), 2022-01-01
Supplement: d2em00271j1.pdf [file d2em00271j1.pdf]

## SUPPORTING INFORMATION

### QUANTUM CHEMICAL CALCULATION OF THE VAPOR PRESSURE OF VOLATILE AND SEMI VOLATILE ORGANIC COMPOUNDS

Marcel Stahn<sup>1</sup>, Stefan Grimme<sup>1</sup>, Tunga Salthammer<sup>2\*</sup>, Uwe Hohm<sup>3</sup>, Wolf-Ulrich Palm<sup>4</sup>

1) Mulliken Center for Theoretical Chemistry, Institute for Physical and Theoretical Chemistry, University of Bonn, 53115 Bonn, Germany

2) Department of Material Analysis and Indoor Chemistry, Fraunhofer WKI, 38108 Braunschweig, Germany

3) Institute of Physical and Theoretical Chemistry, University of Braunschweig – Institute of Technology, 38106 Braunschweig, Germany

4) Institute of Sustainable and Environmental Chemistry, Leuphana University Lüneburg, 21335 Lüneburg, Germany

\*) Corresponding author:

Prof. Dr. Tunga Salthammer

Email: [tunga.salthammer@wki.fraunhofer.de](mailto:tunga.salthammer@wki.fraunhofer.de)

## Fundamentals of vapor pressure thermodynamics

As displayed in Figure 1 (see main text) two phases of a pure substance at equilibrium are considered. In this pressure-temperature diagram the functional relationship between the equilibrium pressure  $P$  and the equilibrium temperature  $T$  is given by the Clapeyron equation (S1).

$$\frac{dP}{dT} = \frac{\Delta_{trs}S}{\Delta_{trs}V} = \frac{\Delta_{trs}H}{T \cdot \Delta_{trs}V} \quad (\text{S1})$$

$\Delta_{trs}S$ ,  $\Delta_{trs}H$ , and  $\Delta_{trs}V$  are the changes in molar entropy, molar enthalpy, and molar volume, respectively, upon phase transition. In the following we only consider the equilibrium between the condensed phase and the vapor phase. Assuming ideal gas behavior and neglecting the molar volume of the condensed phase,  $\Delta_{trs}V = \Delta_{vap}V \approx V_{m,g} \approx P/(RT)$ , the Clausius-Clapeyron equation (S2) results,

$$\frac{d \ln P}{dT} = \frac{\Delta_{vap}H}{R \cdot T^2} \quad (\text{S2})$$

where  $R$  is the molar gas constant and  $\Delta_{vap}H$  is the molar enthalpy of vaporization. Equation (S2) can be used for extrapolation of vapor pressure data. Under the assumption that  $\Delta_{vap}H$  is constant in the interval between  $T_1$  and  $T_2$ , the vapor pressure  $P_1(T_1)$  given at a temperature  $T_{fus} < T_1$  can be used to calculate  $P_2(T_2)$  for a temperature  $T_{fus} < T_2$ ,  $T_{fus}$  being the melting point. If, however,  $T_2 < T_{fus} < T_1$  use of  $P_1(T_1)$  and  $\Delta_{vap}H = \text{const.}$  in equation (2) will result in the vapor pressure  $P_2(T_2)$  of the sub-cooled liquid (see Figure 1 in main text).

**Table S1:** Conversion of units for pressure.

|                    |            |                            |                         |                |
|--------------------|------------|----------------------------|-------------------------|----------------|
| 1 Pa               | ---        | $9.8692 \cdot 10^{-6}$ atm | $1.0 \cdot 10^{-5}$ bar | 0.0075 Torr    |
| 1 atm              | 101,325 Pa | ---                        | 1.01325 bar             | 760 Torr       |
| 1 bar              | 100,000 Pa | 0.98692 atm                | ---                     | 750.06376 Torr |
| 1 Torr (= 1 mm Hg) | 133.322 Pa | 0.00132 atm                | 0.00133 bar             | ---            |

**Conversion from vapor pressure  $P_L$  of the sub-cooled liquid to the saturation concentration  $C_0$  according to the ideal gas law**

$$C_0 = \frac{m}{V} = \frac{P_L \cdot MW}{R \cdot T}$$

For  $C_0$  in  $\mu\text{g}/\text{m}^3$ ,  $T = 298.15$  K,  $R = 8.314$  J/(K·mol),  $P_L$  in Pa, and MW in g/mol:

$$C_0 \left( \frac{\mu\text{g}}{\text{m}^3} \right) = P_L (\text{Pa}) \cdot MW \left( \frac{\text{g}}{\text{mol}} \right) \cdot 403.42$$

**Conversion of energies between Calories and Joule**

Please note that in quantum mechanical publications, the use of the unit "Calorie" for energies is still common and dominant.

$$1 \text{ cal} = 4.1868 \text{ J} \quad 1 \text{ J} = 0.2388 \text{ cal}$$

**SMILES**

The SMILES (Simplified Molecular-Input Line-Entry System) notation for the selected isomer (see Tables S3 and S5) was taken from PubChem (<https://pubchem.ncbi.nlm.nih.gov/>).

**Table S2:** Literature data of the reference compounds (SL = subcooled liquid, DCP = decomposition at higher temperatures).

| Compound                        | Abbr. | CAS       | Density<br>kg/m <sup>3</sup> | MP<br>(°C) | BP<br>(°C) | P <sub>L</sub><br>(Pa)  | Remark        | Δ <sub>vap</sub> H<br>(kJ/mol) | Ref.   |
|---------------------------------|-------|-----------|------------------------------|------------|------------|-------------------------|---------------|--------------------------------|--------|
| n-Decane                        | C10   | 124-18-5  | 730                          | -29.7      | 174.1      | 182                     | 298.15 K      | 51.4                           | 1      |
| n-Hexadecane                    | C16   | 544-76-3  | 773                          | 18.2       | 286.9      | 0.19                    | 298.15 K      | 81.4                           | 2      |
| N-Tridecylbenzene               | TDB   | 123-02-4  | 881                          | 10.0       | 346.0      | 0.007                   | 298.15 K      | 90.4                           | 3, 4   |
| 3-Cresol                        | 3CR   | 108-39-4  | 1034                         | 12.2       | 202        | 18.27                   | 298.05 K      | 61.8±1.0                       | 5      |
| Naphthalene                     | NAP   | 91-20-3   | 1162                         | 80.3       | 217.9      | 37.0                    | 298.15 K (SL) | 56.1                           | 6      |
| Anthracene                      | ANT   | 120-12-7  | 1240                         | 215.8      | 339.9      | 0.072                   | 298.15 K (SL) | 72.4                           | 6      |
| Fluoranthene                    | FLU   | 206-44-0  | 1252                         | 110.2      | 384        | 6.0·10 <sup>-3</sup>    | 298.15 K (SL) | 79.3                           | 6      |
| 2-Butoxy ethanol                | EGBE  | 111-76-2  | 902                          | -75        | 171        | 115                     | 298 K         | 56.6                           | 7, 8   |
| 1-Undecanol                     | UDC   | 112-42-5  | 835                          | 19         | 243        | 0.2383                  | 293.18 K      | 85.0                           | 9      |
| Oleyl alcohol                   | OA    | 143-28-2  | 849                          | 7          | >300       | 3.7·10 <sup>-4</sup>    | 298.15 K      | 101.2 <sup>4</sup>             | 10     |
| Glycerol                        | GLY   | 56-81-5   | 1261                         | 18.1       | 290.0      | 0.0249                  | 298.75        | 86.76±0.70                     | 11     |
| Benzophenone                    | BP    | 119-61-9  | 1085                         | 48.5       | 305.4      | 0.157                   | 298.48 K (SL) | 77.1                           | 12, 13 |
| Benzophenone-3                  | BP-3  | 131-57-7  | 1320                         | 64         | 315        | 4.8·10 <sup>-3</sup>    | 298.15 K (SL) | 76.3                           | 13     |
| Homosalate                      | HS    | 118-56-9  | 1045                         | <-20       | 341        | 1.1·10 <sup>-2</sup>    | 298.15 K      | 95.3                           | 13     |
| Dimethyl phthalate              | DMP   | 131-11-3  | 1190                         | 5.5        | 283.7      | 0.304                   | 298.15 K      | 77.0                           | 14     |
| Diethyl phthalate               | DEP   | 84-66-2   | 1120                         | -40.5      | 295        | 0.099                   | 298.15 K      | 82.1                           | 15     |
| Di-n-butyl phthalate            | DnBP  | 84-74-2   | 1049                         | -35        | 340        | 4.3·10 <sup>-3</sup>    | 298.15 K      | 95.2                           | 16     |
| Butyl benzyl phthalate          | BBzP  | 85-68-7   | 1120                         | -35.0      | 370        | 2.0·10 <sup>-4</sup>    | 298.15 K      | 106.2                          | 16     |
| Dihexyl phthalate <sup>a)</sup> | DHP   | 84-75-3   | 995                          | -58        | 350        | (1.1·10 <sup>-3</sup> ) | 298.15 K      | 111.2 <sup>4</sup>             | 17     |
| Di-(2-ethylhexyl) phthalate     | DEHP  | 117-81-7  | 990                          | -55.0      | 384.0      | 1.6·10 <sup>-5</sup>    | 298 K         | 116.7                          | 16, 18 |
| Di-(2-ethylhexyl) terephthalate | DEHTP | 6422-86-2 | 982                          | -48.0      | 383        | 5.4·10 <sup>-6</sup>    | 298.15 K      | 123.3                          | 16     |
| Methyl palmitoleate             | MP    | 1120-25-8 | 875                          | 0          | >250       | 5.1·10 <sup>-3</sup>    | 298.15 K      | 96.4 <sup>17</sup>             | 19     |

|                                      |         |             |                      |       |       |                     |                      |       |        |
|--------------------------------------|---------|-------------|----------------------|-------|-------|---------------------|----------------------|-------|--------|
| Glutaric acid                        | GA      | 110-94-1    | 1424                 | 98    | 303   | $1.0 \cdot 10^{-3}$ | 298 K <b>(SL)</b>    | 118   | 20     |
| Pimelic acid                         | PA      | 111-16-0    | 1280                 | 106   | >400  | $2.2 \cdot 10^{-4}$ | 298 K <b>(SL)</b>    | 108   | 20     |
| Tris-(2-ethylhexyl) phosphate        | TEHP    | 78-42-2     | 926                  | -74   | DCP   | $3.0 \cdot 10^{-5}$ | 298.15 K             | 106   | 13     |
| Tris-(2-butoxyethyl) phosphate       | TBOEP   | 78-51-3     | 1020                 | -70   | >400  | $6.8 \cdot 10^{-5}$ | 298.15 K             | 103   | 13, 21 |
| 2,4,4'-Trichlorobiphenyl             | PCB-28  | 7012-37-5   | 1400                 | 58    | 207   | $2.7 \cdot 10^{-2}$ | 298.15 K <b>(SL)</b> | 77.1  | 22     |
| 2,2',4,5,5'-Pentachlorobiphenyl      | PCB-101 | 37680-73-2  | 1522                 | 77    | >400  | $2.5 \cdot 10^{-3}$ | 298.15 K <b>(SL)</b> | 86.2  | 22     |
| 2,4,5,2',4',5'-Hexachlorobiphenyl    | PCB-153 | 35065-27-1  | (1000) <sup>b)</sup> | 103   | >400  | $6.1 \cdot 10^{-4}$ | 298.15 K <b>(SL)</b> | 91.8  | 22     |
| 2,2',3,4,4',5,5'-Heptachlorobiphenyl | PCB-180 | 35065-29-3  | 1640                 | 112   | >400  | $1.1 \cdot 10^{-4}$ | 298.15 K <b>(SL)</b> | 94.1  | 22     |
| 1,10-Dichlorodecane                  | C10Cl2  | 2162-98-3   | 994                  | 15.6  | 284.3 | 0.50                | 298.15 K             | 67.3  | 23     |
| 1,2,11,12-Tetrachlorododecane        | C12Cl4  | 210115-98-3 | 1100                 | -     | 354.6 | $3.5 \cdot 10^{-3}$ | 298.15 K <b>(SL)</b> | 81.9  | 23     |
| 2,2',4,4'-Tetrabromodiphenyl ether   | BDE-47  | 5436-43-1   | 2161                 | 84.0  | DCP   | $3.2 \cdot 10^{-4}$ | 298.15 K <b>(SL)</b> | 92.0  | 24     |
| 2,2',4,4',5-Pentabromodiphenyl ether | BDE-99  | 60348-60-9  | 2250                 | 92.5  | DCP   | $6.8 \cdot 10^{-5}$ | 298.15 K <b>(SL)</b> | 100.3 | 24     |
| 1,2,3,4,5-Pentabromo-6-ethyl benzene | PBEB    | 85-22-3     | (1000) <sup>b)</sup> | 138   | -     | $2.9 \cdot 10^{-3}$ | 298.15 K <b>(SL)</b> | 78.3  | 13     |
| Dodecamethylcyclohexasiloxane        | D6      | 540-97-6    | 967                  | -3.0  | 245   | 2.26                | 298.15 K             | 65    | 25     |
| Hexadecamethylheptasiloxane          | L7      | 541-01-5    | 901                  | -78.0 | 286.8 | $7.4 \cdot 10^{-2}$ | 298.15 K             | 89    | 25     |
| Octadecamethyloctasiloxane           | L8      | 556-69-4    | 913                  | -63   | 311.6 | $9.3 \cdot 10^{-3}$ | 298.15 K             | 98    | 25     |
| pp'-DDT                              | DDT     | 50-29-3     | 980                  | 109   | 260   | $4.8 \cdot 10^{-4}$ | 298.15 K <b>(SL)</b> | 89.3  | 13, 26 |
| Diazinon                             | DZN     | 333-41-5    | 1117                 | <25   | -     | $5.9 \cdot 10^{-3}$ | 298.15 K             | 87.5  | 27, 28 |
| Fipronil                             | FIP     | 120068-37-3 | 1477                 | 200   | DCP   | $1.9 \cdot 10^{-6}$ | 298.15 K <b>(SL)</b> | 85    | 27     |

a) The published reference value for DHP is doubtful.

b) Default value – density not available

**Table S3:** Log P<sub>L</sub> values of the reference compounds (see Table S1), calculated SPARC and LFER values (298 K), COSMO values from the literature (SL = subcooled liquid).

| Compound                        | Abbr. | CAS      | log P <sub>L</sub><br>(Reference)<br>(Pa) | log P <sub>L</sub><br>(SPARC) <sup>a)</sup><br>(Pa) | log P <sub>L</sub><br>(LFER) <sup>b)</sup><br>(Pa) | log P <sub>L</sub><br>(COSMO-RS)<br>(Pa) | Remark               |
|---------------------------------|-------|----------|-------------------------------------------|-----------------------------------------------------|----------------------------------------------------|------------------------------------------|----------------------|
| n-Decane                        | C10   | 124-18-5 | 2.26                                      | 2.28                                                | 2.34                                               |                                          | 298.15               |
| n-Hexadecane                    | C16   | 544-76-3 | -0.72                                     | -0.82                                               | -0.41                                              |                                          | 298.15 K             |
| N-Tridecylbenzene               | TDB   | 123-02-4 | -2.15                                     | -2.53                                               | -1.93                                              |                                          | 298.15 K             |
| 3-Cresol                        | 3CR   | 108-39-4 | 1.26                                      | 1.62                                                | 1.28                                               |                                          | 298.05               |
| Naphthalene                     | NAP   | 91-20-3  | 1.57                                      | 1.52                                                | 1.54                                               | 1.84 <sup>29</sup>                       | 298.15 K <b>(SL)</b> |
| Anthracene                      | ANT   | 120-12-7 | -1.14                                     | -1.31                                               | -1.02                                              | -0.37 <sup>29</sup>                      | 298.15 K <b>(SL)</b> |
| Fluoranthene                    | FLU   | 206-44-0 | -2.22                                     | -2.07                                               | -2.40                                              | -1.33 <sup>29</sup>                      | 298.15 K <b>(SL)</b> |
| 2-Butoxy ethanol                | EGBE  | 111-76-2 | 2.06                                      | 1.70                                                | 1.66                                               |                                          | 298 K                |
| 1-Undecanol                     | UDC   | 112-42-5 | -0.36                                     | -0.64                                               | 0.01                                               |                                          | 298.18 K             |
| Oleyl alcohol                   | OA    | 143-28-2 | -3.43                                     | -4.15                                               | -3.50                                              |                                          | 298.15 K             |
| Glycerol                        | GLY   | 56-81-5  | -1.60                                     | -1.26                                               | -0.72                                              |                                          | 298.75               |
| Benzophenone                    | BP    | 119-61-9 | -0.80                                     | -0.74                                               | -0.58                                              |                                          | 298.48 K <b>(SL)</b> |
| Benzophenone-3                  | BP-3  | 131-57-7 | -2.32                                     | -3.79                                               | -2.53                                              |                                          | 298.15 K <b>(SL)</b> |
| Homosalate                      | HS    | 118-56-9 | -1.96                                     | -2.44                                               | -1.72                                              |                                          | 298.15 K             |
| Dimethyl phthalate              | DMP   | 131-11-3 | -0.52                                     | -1.25                                               | 0.26                                               |                                          | 298.15 K             |
| Diethyl phthalate               | DEP   | 84-66-2  | -1.00                                     | -1.82                                               | -0.40                                              |                                          | 298.15 K             |
| Di-n-butyl phthalate            | DnBP  | 84-74-2  | -2.37                                     | -3.47                                               | -2.18                                              |                                          | 298.15 K             |
| Butyl benzyl phthalate          | BBzP  | 85-68-7  | -3.70                                     | -5.47                                               | -4.12                                              |                                          | 298.15 K             |
| Dihexyl phthalate <sup>d)</sup> | DHP   | 84-75-3  | <b>(-2.96)</b>                            | -5.40                                               | -4.11                                              |                                          | 298.15 K             |
| Di-(2-ethylhexyl) phthalate     | DEHP  | 117-81-7 | -4.80                                     | -6.85                                               | -5.48                                              |                                          | 298 K                |

|                                      |         |             |       |       |       |                        |                      |
|--------------------------------------|---------|-------------|-------|-------|-------|------------------------|----------------------|
| Di-(2-ethylhexyl) terephthalate      | DEHTP   | 6422-86-2   | -5.27 | -6.44 | -4.96 |                        | 298.15 K             |
| Methyl palmitoleate                  | MP      | 1120-25-8   | -2.29 | -1.95 | -1.59 |                        | 298.15 K             |
| Glutaric acid                        | GA      | 110-94-1    | -3.00 | -4.03 | -2.23 |                        | 298 K <b>(SL)</b>    |
| Pimelic acid                         | PA      | 111-16-0    | -3.66 | -5.10 | -3.90 |                        | 298 K <b>(SL)</b>    |
| Tris-(2-ethylhexyl) phosphate        | TEHP    | 78-42-2     | -4.52 | -6.13 | -4.39 |                        | 298.15 K             |
| Tris-(2-butoxyethyl) phosphate       | TBOEP   | 78-51-3     | -4.17 | -4.80 | -3.76 |                        | 298.15 K             |
| 2,4,4'-Trichlorobiphenyl             | PCB-28  | 7012-37-5   | -1.57 | -2.05 | -1.30 |                        | 298.15 K <b>(SL)</b> |
| 2,2',4,5,5'-Pentachlorobiphenyl      | PCB-101 | 37680-73-2  | -2.60 | -3.59 | -2.52 |                        | 298.15 K <b>(SL)</b> |
| 2,4,5,2',4',5'-Hexachlorobiphenyl    | PCB-153 | 35065-27-1  | -3.21 | -4.61 | -3.35 |                        | 298.15 K <b>(SL)</b> |
| 2,2',3,4,4',5,5'-Heptachlorobiphenyl | PCB-180 | 35065-29-3  | -3.96 | -5.71 | -4.30 |                        | 298.15 K <b>(SL)</b> |
| 1,10-Dichlorodecane                  | C10Cl2  | 2162-98-3   | -0.30 | -0.24 | 0.42  |                        | 298.15 K             |
| 1,2,11,12-Tetrachlorododecane        | C12Cl4  | 210115-98-3 | -2.46 | -2.59 | -1.77 | -2.73 <sup>c)</sup> 30 | 298.15 K <b>(SL)</b> |
| 2,2',4,4'-Tetrabromodiphenyl ether   | BDE-47  | 5436-43-1   | -3.49 | -5.18 | -3.90 |                        | 298.15 K <b>(SL)</b> |
| 2,2',4,4',5-Pentabromodiphenyl ether | BDE-99  | 60348-60-9  | -4.17 | -6.87 | -4.92 |                        | 298.15 K <b>(SL)</b> |
| 1,2,3,4,5-Pentabromo-6-ethyl benzene | PBEB    | 85-22-3     | -2.54 | -4.23 | -3.07 | -2.21 <sup>31</sup>    | 298.15 K <b>(SL)</b> |
| Dodecamethylcyclhexasiloxane         | D6      | 540-97-6    | 0.35  | -0.23 | 1.09  |                        | 298.15 K             |
| Hexadecamethylheptasiloxane          | L7      | 541-01-5    | -1.13 | -0.27 | -0.48 |                        | 298.15 K             |
| Octadecamethyloctasiloxane           | L8      | 556-69-4    | -2.03 | -1.08 | -1.33 |                        | 298.15 K             |
| pp'-DDT                              | DDT     | 50-29-3     | -3.32 | -4.19 | -3.77 |                        | 298.15 K <b>(SL)</b> |
| Diazinon                             | DZN     | 333-41-5    | -2.23 | -3.10 | -1.28 |                        | 298.15 K             |
| Fipronil                             | FIP     | 120068-37-3 | -5.72 | -4.60 | -8.35 |                        | 298.15 K <b>(SL)</b> |

a) In SPARC it was assumed that the substance is not solid at room temperature

b) Vapor pressure for the subcooled liquid. Calculation: Schwarzenbach et al. (2017), p. 249; data: LFER Database

c) Calculated for all congeners C<sub>12</sub>Cl<sub>4</sub>

d) The published reference value for DHP is doubtful.

**Table S4:** Sampling solvents used for the creation of the CREST ensemble.

| <b>Compound</b>                 | <b>Abbr.</b> | <b>CAS</b> | <b>Sampling solvent</b> |
|---------------------------------|--------------|------------|-------------------------|
| n-Decane                        | C10          | 124-18-5   | n-Hexadecane            |
| n-Hexadecane                    | C16          | 544-76-3   | n-Hexadecane            |
| N-Tridecylbenzene               | TDB          | 123-02-4   | n-Hexadecane            |
| 3-Cresol                        | 3CR          | 108-39-4   | Phenol                  |
| Naphthalene                     | NAP          | 91-20-3    | Benzene                 |
| Anthracene                      | ANT          | 120-12-7   | Benzene                 |
| Fluoranthene                    | FLU          | 206-44-0   | Benzene                 |
| 2-Butoxy ethanol                | EGBE         | 111-76-2   | Diethylether            |
| 1-Undecanol                     | UDC          | 112-42-5   | 1-Octanol               |
| Oleyl alcohol                   | OA           | 143-28-2   | 1-Octanol               |
| Glycerol                        | GLY          | 56-81-5    | Methanol                |
| Benzophenone                    | BP           | 119-61-9   | Phenol                  |
| Benzophenone-3                  | BP-3         | 131-57-7   | Phenol                  |
| Homosalate                      | HS           | 118-56-9   | Phenol                  |
| Dimethyl phthalate              | DMP          | 131-11-3   | Phenol                  |
| Diethyl phthalate               | DEP          | 84-66-2    | Phenol                  |
| Di-n-butyl phthalate            | DnBP         | 84-74-2    | Phenol                  |
| Butyl benzyl phthalate          | BBzP         | 85-68-7    | Phenol                  |
| Dihexyl phthalate               | DHP          | 84-75-3    | Phenol                  |
| Di-(2-ethylhexyl) phthalate     | DEHP         | 117-81-7   | Phenol                  |
| Di-(2-ethylhexyl) terephthalate | DEHTP        | 6422-86-2  | Phenol                  |
| Methyl palmitoleate             | MP           | 1120-25-8  | Acetone                 |



|                                      |         |             |                 |
|--------------------------------------|---------|-------------|-----------------|
| Glutaric acid                        | GA      | 110-94-1    | Acetone         |
| Pimelic acid                         | PA      | 111-16-0    | Acetone         |
| Tris-(2-ethylhexyl) phosphate        | TEHP    | 78-42-2     | Acetone         |
| Tris-(2-butoxyethyl) phosphate       | TBOEP   | 78-51-3     | Acetone         |
| 2,4,4'-Trichlorobiphenyl             | PCB-28  | 7012-37-5   | Phenol          |
| 2,2',4,5,5'-Pentachlorobiphenyl      | PCB-101 | 37680-73-2  | Phenol          |
| 2,4,5,2',4',5'-Hexachlorobiphenyl    | PCB-153 | 35065-27-1  | Dichloromethane |
| 2,2',3,4,4',5,5'-Heptachlorobiphenyl | PCB-180 | 35065-29-3  | Phenol          |
| 1,10-Dichlorodecane                  | C10Cl2  | 2162-98-3   | Dichloromethane |
| 1,2,11,12-Tetrachlorododecane        | C12Cl4  | 210115-98-3 | Dichloromethane |
| 2,2',4,4'-Tetrabromodiphenyl ether   | BDE-47  | 5436-43-1   | Dichloromethane |
| 2,2',4,4',5-Pentabromodiphenyl ether | BDE-99  | 60348-60-9  | Dichloromethane |
| 1,2,3,4,5-Pentabromo-6-ethyl benzene | PBEB    | 85-22-3     | Dichloromethane |
| Dodecamethylcyclohexasiloxane        | D6      | 540-97-6    | Toluene         |
| Hexadecamethylheptasiloxane          | L7      | 541-01-5    | Toluene         |
| Octadecamethyloctasiloxane           | L8      | 556-69-4    | Toluene         |
| pp'-DDT                              | DDT     | 50-29-3     | Dichloromethane |
| Diazinon                             | DZN     | 333-41-5    | Aniline         |
| Fipronil                             | FIP     | 120068-37-3 | Aniline         |

**Table S5:** Log P<sub>L</sub> data of the studied compounds with unknown vapor pressure (SL = subcooled liquid). All data for 298 K.

| Compounds                                                        | Abbr. | CAS         | MP<br>(°C) | BP<br>(°C) | log P <sub>L</sub> (Pa)<br>(SPARC) <sup>a)</sup> | log P <sub>L</sub> (Pa)<br>(LFER) <sup>b)</sup> | Remark |
|------------------------------------------------------------------|-------|-------------|------------|------------|--------------------------------------------------|-------------------------------------------------|--------|
| <b>Plasticizers</b>                                              |       |             |            |            |                                                  |                                                 |        |
| Di-2-propylheptyl phthalate                                      | DPHP  | 53306-54-0  | <25        | >400       | -8.87                                            | -6.71                                           |        |
| Di-isononyl phthalate <sup>c)</sup>                              | DINP  | 28553-12-0  | -48        | >400       | -8.04                                            | -6.65                                           |        |
| 1,2-Cyclohexane dicarboxylic acid diisononyl ester <sup>d)</sup> | DINCH | 166412-78-8 | <0         | 394        | -6.88                                            | -6.22                                           |        |
| Tri-2-ethylhexyltrimellitate                                     | TOTM  | 3319-31-1   | -46        | 414        | -12.11                                           | -9.15                                           |        |
| Di-iso-butyl adipate                                             | DIBA  | 141-04-8    | -20        | 279        | -1.35                                            | -0.61                                           |        |
| Di-n-butyl adipate                                               | DnBA  | 105-99-7    | -32        | 305        | -1.54                                            | -1.25                                           |        |
| Di-2-ethylhexyl adipate                                          | DEHA  | 103-23-1    | -67        | >400       | -5.08                                            | -3.92                                           |        |
| Di-isononyl adipate <sup>e)</sup>                                | DINA  | 33703-08-1  | <0         | >400       | -7.12                                            | -5.16                                           |        |
| <b>Biocides</b>                                                  |       |             |            |            |                                                  |                                                 |        |
| Acetamiprid                                                      | ACP   | 135410-20-7 | 102        | 352        | -2.15                                            | -1.59                                           | SL     |
| Icaridin                                                         | ICD   | 119515-38-7 | -          | 296        | -3.08                                            | -2.26                                           | SL     |
| Cyromazine                                                       | CMZ   | 66215-27-8  | 222        | -          | -5.19                                            | -4.76                                           | SL     |
| Diflubenzuron                                                    | DFB   | 35367-38-5  | 232        | -          | -6.14                                            | -3.66                                           | SL     |
| Cyphenothrin                                                     | CPT   | 39515-40-7  | -25        | -          | -6.96                                            | -7.07                                           |        |
| Methoprene                                                       | MTP   | 40596-69-8  | <25        | 256        | -3.54                                            | -1.67                                           | SL     |
| <b>Pharmaceuticals</b>                                           |       |             |            |            |                                                  |                                                 |        |
| Bisoprolol                                                       | BPL   | 66722-44-9  | 102        | 445        | -6.47                                            | -8.02                                           | SL     |
| Diclofenac                                                       | DIC   | 15307-86-5  | 158        | -          | -6.68                                            | -7.11                                           | SL     |
| Dapagliflozin                                                    | DLF   | 461432-26-8 | 65         | 609        | -17.85                                           | -19.56                                          | SL     |
| Ibuprofen                                                        | IBU   | 15687-27-1  | 76         | 320        | -2.3                                             | -2.50                                           | SL     |
| Metoprolol                                                       | MPL   | 51384-51-1  | 120        | 399        | -4.58                                            | -2.22                                           | SL     |
| Naproxen                                                         | NPX   | 22204-53-1  | 152        | -          | -4.65                                            | -5.66                                           | SL     |
| Torasemide                                                       | TS    | 56211-40-6  | 164        | -          | -9.66                                            | -13.44                                          | SL     |

a) It was assumed that the substance is not solid at room temperature

b) Vapor pressure for the subcooled liquid. Calculation: Schwarzenbach et al. (2017), p. 249<sup>32</sup>

c) SMILES is for the isomer bis(7-methyloctyl) phthalate

d) SMILES is for the isomer bis(7-methyloctyl) 1,2-cyclohexanedicarboxylate

e) SMILES is for the isomer bis(7-methyloctyl) adipate

**Table S6:** LFER parameters of the reference compounds. All data for 298 K. The data were retrieved from the UFZ-LSER database.<sup>33</sup>

| Compound                        | Abbr. | CAS       | L      | S    | A    | B    | log P <sub>L</sub> (Pa)<br>(LFER) |
|---------------------------------|-------|-----------|--------|------|------|------|-----------------------------------|
| n-Decane                        | C10   | 124-18-5  | 4.686  | 0.00 | 0.00 | 0.00 | 2.34                              |
| n-Hexadecane                    | C16   | 544-76-3  | 7.771  | 0.00 | 0.00 | 0.00 | -0.41                             |
| N-Tridecylbenzene               | TDB   | 123-02-4  | 9.376  | 0.47 | 0.00 | 0.15 | -1.93                             |
| 3-Cresol                        | 3CR   | 108-39-4  | 4.310  | 0.88 | 0.57 | 0.34 | 1.28                              |
| Naphthalene                     | NAP   | 91-20-3   | 5.161  | 0.92 | 0.00 | 0.20 | 1.54                              |
| Anthracene                      | ANT   | 120-12-7  | 7.568  | 1.34 | 0.00 | 0.28 | -1.02                             |
| Fluoranthene                    | FLU   | 206-44-0  | 8.827  | 1.55 | 0.00 | 0.24 | -2.40                             |
| 2-Butoxy ethanol                | EGBE  | 111-76-2  | 3.806  | 0.50 | 0.30 | 0.83 | 1.66                              |
| 1-Undecanol                     | UDC   | 112-42-5  | 6.128  | 0.42 | 0.37 | 0.48 | 0.01                              |
| Oleyl alcohol                   | OA    | 143-28-2  | 9.565  | 0.58 | 0.36 | 0.69 | -3.50                             |
| Glycerol                        | GLY   | 56-81-5   | 3.145  | 0.72 | 0.64 | 1.21 | -0.72                             |
| Benzophenone                    | BP    | 119-61-9  | 6.852  | 1.50 | 0.00 | 0.50 | -0.58                             |
| Benzophenone-3                  | BP-3  | 131-57-7  | 8.840  | 1.63 | 0.00 | 0.62 | -2.53                             |
| Homosalate                      | HS    | 118-56-9  | 8.614  | 0.87 | 0.09 | 0.48 | -1.72                             |
| Dimethyl phthalate              | DMP   | 131-11-3  | 6.050  | 1.40 | 0.00 | 0.86 | 0.26                              |
| Diethyl phthalate               | DEP   | 84-66-2   | 6.790  | 1.40 | 0.00 | 0.88 | -0.40                             |
| Di-n-butyl phthalate            | DnBP  | 84-74-2   | 8.970  | 1.27 | 0.00 | 0.95 | -2.18                             |
| Butyl benzyl phthalate          | BBzP  | 85-68-7   | 10.820 | 1.51 | 0.00 | 1.13 | -4.12                             |
| Dihexyl phthalate               | DHP   | 84-75-3   | 11.110 | 1.29 | 0.00 | 0.96 | -4.11                             |
| Di-(2-ethylhexyl) phthalate     | DEHP  | 117-81-7  | 12.700 | 1.25 | 0.00 | 1.02 | -5.48                             |
| Di-(2-ethylhexyl) terephthalate | DEHTP | 6422-86-2 | 12.327 | 1.06 | 0.00 | 0.71 | -4.96                             |
| Methyl palmitoleate             | MP    | 1120-25-8 | 8.853  | 0.71 | 0.00 | 0.68 | -1.59                             |

|                                      |         |             |        |       |      |      |       |
|--------------------------------------|---------|-------------|--------|-------|------|------|-------|
| Glutaric acid                        | GA      | 110-94-1    | 4.207  | 1.28  | 1.05 | 0.75 | -2.23 |
| Pimelic acid                         | PA      | 111-16-0    | 5.277  | 1.26  | 1.10 | 0.84 | -3.90 |
| Tris-(2-ethylhexyl) phosphate        | TEHP    | 78-42-2     | 12.091 | 0.57  | 0.00 | 0.88 | -4.39 |
| Tris-(2-butoxyethyl)phosphate        | TBOEP   | 78-51-3     | 10.565 | 1.40  | 0.00 | 2.22 | -3.76 |
| 2,4,4'-Trichlorobiphenyl             | PCB-28  | 7012-37-5   | 7.904  | 1.33  | 0.00 | 0.15 | -1.30 |
| 2,2',4,5,5'-Pentachlorobiphenyl      | PCB-101 | 37680-73-2  | 8.868  | 1.61  | 0.00 | 0.13 | -2.52 |
| 2,4,5,2',4',5'-Hexachlorobiphenyl    | PCB-153 | 35065-27-1  | 9.587  | 1.74  | 0.00 | 0.11 | -3.35 |
| 2,2',3,4,4',5,5'-Heptachlorobiphenyl | PCB-180 | 35065-29-3  | 10.415 | 1.87  | 0.00 | 0.09 | -4.30 |
| 1,10-Dichlorodecane                  | C10Cl2  | 2162-98-3   | 6.466  | 0.87  | 0.00 | 0.17 | 0.42  |
| 1,2,11,12-Tetrachlorododecane        | C12Cl4  | 210115-98-3 | 8.861  | 0.94  | 0.00 | 0.00 | -1.77 |
| 2,2',4,4'-Tetrabromodiphenyl ether   | BDE-47  | 5436-43-1   | 10.660 | 1.45  | 0.00 | 0.34 | -3.90 |
| 2,2',4,4',5-Pentabromodiphenyl ether | BDE-99  | 60348-60-9  | 11.710 | 1.51  | 0.00 | 0.44 | -4.92 |
| 1,2,3,4,5-Pentabromo-6-ethyl benzene | PBEB    | 85-22-3     | 9.848  | 1.36  | 0.00 | 0.00 | -3.07 |
| Dodecamethylcyclohexasiloxane        | D6      | 540-97-6    | 6.080  | -0.12 | 0.00 | 0.74 | 1.09  |
| Hexadecamethylheptasiloxane          | L7      | 541-01-5    | 7.838  | -0.20 | 0.00 | 0.94 | -0.48 |
| Octadecamethyloctasiloxane           | L8      | 556-69-4    | 8.787  | -0.23 | 0.00 | 1.08 | -1.33 |
| pp'-DDT                              | DDT     | 50-29-3     | 10.020 | 1.76  | 0.00 | 0.16 | -3.77 |
| Diazinon                             | DZN     | 333-41-5    | 8.001  | 0.81  | 0.06 | 1.18 | -1.28 |
| Fipronil                             | FIP     | 120068-37-3 | 10.065 | 2.81  | 0.29 | 1.54 | -8.35 |

**Table S7:** LFER parameters of the studied compounds with unknown vapor pressure. All data for 298 K. The data were retrieved from the UFZ-LSER database.<sup>33</sup>

| Compound                                                         | Abbr. | CAS         | L      | S    | A     | B    | log P <sub>L</sub> (Pa)<br>(LFER) <sup>a)</sup> |
|------------------------------------------------------------------|-------|-------------|--------|------|-------|------|-------------------------------------------------|
| <b>Plasticizers</b>                                              |       |             |        |      |       |      |                                                 |
| Di-2-propylheptyl phthalate                                      | DPHP  | 53306-54-0  | 14.30  | 1.06 | 0.00  | 0.90 | -6.71                                           |
| Di-isononyl phthalate <sup>b)</sup>                              | DINP  | 28553-12-0  | 13.99  | 1.27 | 0.00  | 1.02 | -6.65                                           |
| 1,2-Cyclohexane dicarboxylic acid diisononyl ester <sup>c)</sup> | DINCH | 166412-78-8 | 13.682 | 1.12 | 0.00  | 0.99 | -6.22                                           |
| Tri-2-ethylhexyltrimellitate                                     | TOTM  | 3319-31-1   | 17.017 | 1.08 | 0.00  | 1.02 | -9.15                                           |
| Di-iso-butyl adipate                                             | DIBA  | 141-04-8    | 7.586  | 0.92 | 0.00  | 0.97 | -0.61                                           |
| Di-n-butyl adipate                                               | DnBA  | 105-99-7    | 8.102  | 1.12 | 0.00  | 1.03 | -1.25                                           |
| Di-2-ethylhexyl adipate                                          | DEHA  | 103-23-1    | 11.297 | 0.92 | 0.00  | 0.97 | -3.92                                           |
| Di-isononyl adipate <sup>d)</sup>                                | DINA  | 33703-08-1  | 12.478 | 1.13 | 0.00  | 1.10 | -5.16                                           |
| <b>Biocides</b>                                                  |       |             |        |      |       |      |                                                 |
| Acetamidrid                                                      | ACP   | 135410-20-7 | 7.51   | 1.57 | 0.05  | 1.21 | -1.59                                           |
| Icaridin                                                         | ICD   | 119515-38-7 | 7.397  | 1.03 | 0.33  | 0.96 | -2.26                                           |
| Cyromazine                                                       | CMZ   | 66215-27-8  | 6.929  | 1.74 | 0.56  | 1.24 | -4.76                                           |
| Diflubenzuron                                                    | DFB   | 35367-38-5  | 9.68   | 1.17 | 0.18  | 0.97 | -3.66                                           |
| Cyphenothrin                                                     | CPT   | 39515-40-7  | 12.326 | 2.29 | 0.05  | 1.11 | -7.07                                           |
| Methoprene                                                       | MTP   | 40596-69-8  | 8.976  | 0.66 | 0.00  | 0.97 | -1.67                                           |
| <b>Pharmaceuticals</b>                                           |       |             |        |      |       |      |                                                 |
| Bisoprolol                                                       | BPL   | 66722-44-9  | 11.2   | 1.50 | 0.30  | 2.19 | -8.02                                           |
| Diclofenac                                                       | DIC   | 15307-86-5  | 11.025 | 1.85 | 0.55  | 0.77 | -7.11                                           |
| Dapagliflozin                                                    | DLF   | 461432-26-8 | 14.465 | 2.58 | 0.97  | 1.95 | -19.56                                          |
| Ibuprofen                                                        | IBU   | 15687-27-1  | 7.184  | 0.70 | 0.56  | 0.79 | -2.50                                           |
| Metoprolol                                                       | MPL   | 51384-51-1  | 9.157  | 1.61 | -0.06 | 1.72 | -2.22                                           |
| Naproxen                                                         | NPX   | 22204-53-1  | 9.207  | 2.02 | 0.60  | 0.67 | -5.66                                           |
| Torasemid                                                        | TS    | 56211-40-6  | 13.23  | 2.18 | 0.70  | 1.60 | -13.44                                          |

a) Vapor pressure for the subcooled liquid. Calculation: Schwarzenbach et al. (2017), p. 249<sup>32</sup>

b) SMILES is for the isomer bis(7-methyloctyl) phthalate

c) SMILES is for the isomer bis(7-methyloctyl) 1,2-cyclohexanedicarboxylate

d) SMILES is for the isomer bis(7-methyloctyl) adipate

## References

1. K. Růžička and V. Majer, Simultaneous Treatment of Vapor Pressures and Related Thermal Data Between the Triple and Normal Boiling Temperatures for n-Alkanes C5–C20, *Journal of Physical and Chemical Reference Data*, 1994, **23**, 1-39.
2. J. S. Chickos and W. Hanshaw, Vapor Pressures and Vaporization Enthalpies of the n-Alkanes from C21 to C30 at T = 298.15 K by Correlation Gas Chromatography, *Journal of Chemical & Engineering Data*, 2004, **49**, 77-85.
3. P. M. Sherblom, P. M. Gschwend and R. P. Eganhouse, Aqueous solubilities, vapor pressures, and 1-octanol-water partition coefficients for C9-C14 linear alkylbenzenes, *Journal of Chemical & Engineering Data*, 1992, **37**, 394-399.
4. W. V. Wilding, T. A. Knotts, N. F. Giles and R. L. Rowley, *DIPPR Data Compilation of Pure Chemical Properties*, Design Institute for Physical Properties - AIChE, New York, NY, 2020.
5. D. P. Biddiscombe and J. F. Martin, Vapour pressures of phenol and the cresols, *Transactions of the Faraday Society*, 1958, **54**, 1316-1322.
6. Y. D. Lei, R. Chankalal, A. Chan and F. Wania, Supercooled Liquid Vapor Pressures of the Polycyclic Aromatic Hydrocarbons, *Journal of Chemical & Engineering Data*, 2002, **47**, 801-806.
7. Y. Koga, Vapor pressures of aqueous 2-butoxyethanol solutions at 25.degree.C: transitions in mixing scheme, *The Journal of Physical Chemistry*, 1991, **95**, 4119-4126.
8. W. Acree and J. S. Chickos, Phase Transition Enthalpy Measurements of Organic and Organometallic Compounds. Sublimation, Vaporization and Fusion Enthalpies From 1880 to 2015. Part 1. C1 – C10, *Journal of Physical and Chemical Reference Data*, 2016, **45**, 033101.
9. J. N'Guimbi, H. Kasehgari, I. Mokbel and J. Jose, Tensions de vapeur d'alcools primaires dans le domaine 0,3 Pa à 1,5 kPa, *Thermochimica Acta*, 1992, **196**, 367-377.
10. B. Koutek, M. Hoskovec, P. Vrkočová, K. Konečný and L. Feltl, Gas chromatographic determination of vapour pressures of pheromone-like compounds II. Alcohols, *Journal of Chromatography A*, 1994, **679**, 307-317.
11. H. K. Cammenga, F. W. Schulze and W. Theuerl, Vapor pressure and evaporation coefficient of glycerol, *Journal of Chemical & Engineering Data*, 1977, **22**, 131-134.
12. V. Štejfa, M. Fulem, K. Růžička and P. Morávek, New Static Apparatus for Vapor Pressure Measurements: Reconciled Thermophysical Data for Benzophenone, *Journal of Chemical & Engineering Data*, 2016, **61**, 3627-3639.

13. J. O. Okeme, T. F. M. Rodgers, J. M. Parnis, M. L. Diamond, T. F. Bidleman and L. M. Jantunen, Gas Chromatographic Estimation of Vapor Pressures and Octanol–Air Partition Coefficients of Semivolatile Organic Compounds of Emerging Concern, *Journal of Chemical & Engineering Data*, 2020, **65**, 2467-2475.
14. V. Roháč, J. E. Musgrove, K. Ružička, V. Ružička, M. Záborský and K. Aim, Thermodynamic properties of dimethyl phthalate along the (vapour + liquid) saturation curve, *The Journal of Chemical Thermodynamics*, 1999, **31**, 971-986.
15. V. Roháč, K. Ružička, V. Ružička, D. H. Zaitsau, G. J. Kabo, V. Diky and K. Aim, Vapour pressure of diethyl phthalate, *The Journal of Chemical Thermodynamics*, 2004, **36**, 929-937.
16. C. Gobble, J. Chickos and S. P. Verevkin, Vapor pressures and vaporization enthalpies of a series of dialkyl phthalates by correlation gas chromatography, *Journal of Chemical and Engineering Data*, 2014, **59**, 1353-1365.
17. V. A. Tsendrovskaya, Determination of vapor pressure and volatility of some diesters of phthalic acid, *Gigiena i Sanitarija*, 1972, **37**, 101-103.
18. Y. Wu, C. M. A. Eichler, S. Chen and J. C. Little, Simple Method To Measure the Vapor Pressure of Phthalates and Their Alternatives, *Environmental Science & Technology*, 2016, **50**, 10082-10088.
19. D. Lipkind, Y. Kapustin, P. Umnahanant and J. S. Chickos, The vaporization enthalpies and vapor pressures of a series of unsaturated fatty acid methyl esters by correlation gas chromatography, *Thermochimica Acta*, 2007, **456**, 94-101.
20. M. Bilde, K. Barsanti, M. Booth, C. D. Cappa, N. M. Donahue, E. U. Emanuelsson, G. McFiggans, U. K. Krieger, C. Marcolli, D. Topping, P. Ziemann, M. Barley, S. Clegg, B. Dennis-Smith, M. Hallquist, Å. M. Hallquist, A. Khlystov, M. Kulmala, D. Mogensen, C. J. Percival, F. Pope, J. P. Reid, M. A. V. Ribeiro da Silva, T. Rosenoern, K. Salo, V. P. Soonsin, T. Yli-Juuti, N. L. Prisle, J. Pagels, J. Rarey, A. A. Zardini and I. Riipinen, Saturation Vapor Pressures and Transition Enthalpies of Low-Volatility Organic Molecules of Atmospheric Relevance: From Dicarboxylic Acids to Complex Mixtures, *Chemical Reviews*, 2015, **115**, 4115-4156.
21. S. Brommer, L. M. Jantunen, T. F. Bidleman, S. Harrad and M. L. Diamond, Determination of Vapor Pressures for Organophosphate Esters, *Journal of Chemical & Engineering Data*, 2014, **59**, 1441-1447.
22. N. Li, F. Wania, Y. D. Lei and G. L. Daly, A Comprehensive and Critical Compilation, Evaluation, and Selection of Physical–Chemical Property Data for Selected Polychlorinated Biphenyls, *Journal of Physical and Chemical Reference Data*, 2003, **32**, 1545-1590.
23. K. G. Drouillard, G. T. Tomy, D. C. G. Muir and K. J. Friesen, Volatility of chlorinated n-alkanes (C10–C12): Vapor pressures and Henry's law constants, *Environmental Toxicology and Chemistry*, 1998, **17**, 1252-1260.

24. A. Wong, Y. D. Lei, M. Alaei and F. Wania, Vapor Pressures of the Polybrominated Diphenyl Ethers, *Journal of Chemical & Engineering Data*, 2001, **46**, 239-242.
25. Y. D. Lei, F. Wania and D. Mathers, Temperature-Dependent Vapor Pressure of Selected Cyclic and Linear Polydimethylsiloxane Oligomers, *Journal of Chemical & Engineering Data*, 2010, **55**, 5868-5873.
26. L. Shen and F. Wania, Compilation, Evaluation, and Selection of Physical-Chemical Property Data for Organochlorine Pesticides, *Journal of Chemical & Engineering Data*, 2005, **50**, 742-768.
27. A. Goel, L. L. McConnell and A. Torrents, Determination of vapor pressure-temperature relationships of current-use pesticides and transformation products, *Journal of Environmental Science and Health, Part B*, 2007, **42**, 343-349.
28. D. Mackay, W. Y. Shiu, K.-C. Ma and S. C. Lee, *Handbook of Physical-Chemical Properties and Environmental Fate for Organic Chemicals. Volume IV: Nitrogen and Sulphur Containing Compounds and Pesticides*, CRC Press, Boca Raton, 2006.
29. B. Schröder, L. M. N. B. F. Santos, M. A. A. Rocha, M. B. Oliveira, I. M. Marrucho and J. A. P. Coutinho, Prediction of environmental parameters of polycyclic aromatic hydrocarbons with COSMO-RS, *Chemosphere*, 2010, **79**, 821-829.
30. J. Hammer, H. Matsukami, H. Kuramochi and S. Endo, Direct measurements and modeling of congener group specific vapor pressure for chlorinated paraffins, *Chemosphere*, 2021, **281**, 130909.
31. K. Yui, T. Motoki, H. Kato, H. Kuramochi, T. Tsuji, S.-i. Sakai and F. Wania, Measurement of Vapor Pressures and Melting Properties of Five Polybrominated Aromatic Flame Retardants, *Journal of Chemical & Engineering Data*, 2018, **63**, 2578-2585.
32. R. P. Schwarzenbach, P. M. Gschwend and D. M. Imboden, *Environmental Organic Chemistry*, John Wiley & Sons, Hoboken, NJ, 2017.
33. N. Ulrich, S. Endo, T. N. Brown, N. Watanabe, G. Bronner, M. H. Abraham and K.-U. Goss, UFZ-LSER database v 3.2.1 [Internet]. Helmholtz Centre for Environmental Research, Leipzig, 2017.
